# Supplementary material for: General synthesis of magnetic binary transition metal telluride nanocrystals
Source: Royal Society of Chemistry journal article supplement (doi:10.1039/d4tc00532e), 2024-01-01
Supplement: d4tc00532e1.pdf [file d4tc00532e1.pdf]

Supporting Information for

## **General Synthesis of Magnetic Binary Transition Metal Telluride Nanocrystals**

Jingxia Wang<sup>a</sup>, Bin Wang<sup>a</sup>, Yifen Wang<sup>a</sup>, Ruixia Yang<sup>a</sup>, Lanfang Wang<sup>a</sup>, Fang Wang<sup>a</sup>,  
Xiaohong, Xu<sup>a</sup>, and Yang Liu<sup>b,\*</sup>

<sup>a</sup>Research Institute of Materials Science of Shanxi Normal University & Key  
Laboratory of Magnetic Molecules and Magnetic Information Materials of Ministry of  
Education, Taiyuan 030031, China.

<sup>b</sup>Department of Materials Science, Fudan University, Shanghai 200433, China.

\*Correspondence should be addressed to Yang Liu (liuyang\_fd@fudan.edu.cn)

**Table S1.** Summary of experimental parameters used for the synthesis of metal telluride NCs.

|       | metal precursor       | M:Te molar ratio | Reaction time (min) | Reaction temperature (°C) | Product NCs           |
|-------|-----------------------|------------------|---------------------|---------------------------|-----------------------|
| Ni-Te | Ni(acac) <sub>2</sub> | 1:2              | 5                   | 250                       | NiTe <sub>2</sub>     |
|       |                       | 1:2              | 5                   | 300                       | NiTe <sub>2</sub>     |
|       |                       | 1:2              | 60                  | 330                       | NiTe <sub>2</sub>     |
|       |                       | 1:1.5            | 5                   | 250                       | Ni <sub>0.75</sub> Te |
|       |                       | 1:1.5            | 5                   | 300                       | Ni <sub>0.64</sub> Te |
|       |                       | 1:1.5            | 60                  | 330                       | Ni <sub>0.53</sub> Te |
|       |                       | 1:1              | 5                   | 250                       | NiTe                  |
|       |                       | 1:1              | 5                   | 300                       | NiTe                  |
|       |                       | 1:1              | 60                  | 330                       | Ni <sub>0.88</sub> Te |
|       | Ni(OAc) <sub>2</sub>  | 1:2              | 60                  | 330                       | NiTe <sub>2</sub>     |
|       |                       | 1:1.5            | 60                  | 300                       | Ni <sub>0.64</sub> Te |
|       | NiCl <sub>2</sub>     | 1:2              | 60                  | 330                       | NiTe <sub>2</sub>     |
|       |                       | 1:1.5            | 60                  | 300                       | Ni <sub>0.64</sub> Te |
| Co-Te | Co(acac) <sub>2</sub> | 1:2              | 60                  | 300                       | CoTe <sub>2</sub>     |
|       |                       | 1:2              | 60                  | 330                       | CoTe <sub>2</sub>     |
|       |                       | 1:1.5            | 5                   | 250                       | CoTe <sub>2</sub>     |
|       |                       | 1:1.5            | 5                   | 300                       | CoTe <sub>2</sub>     |
|       |                       | 1:1.5            | 60                  | 330                       | Co <sub>0.64</sub> Te |
|       |                       | 1:1              | 5                   | 250                       | CoTe <sub>2</sub>     |
|       |                       | 1:1              | 5                   | 300                       | CoTe <sub>2</sub>     |
|       |                       | 1:1              | 60                  | 330                       | CoTe                  |
|       | Co(OAc) <sub>2</sub>  | 1:2              | 60                  | 330                       | CoTe <sub>2</sub>     |
|       |                       | 1:1.5            | 60                  | 330                       | Co <sub>0.67</sub> Te |
|       |                       | 1:1              | 60                  | 330                       | Co <sub>0.83</sub> Te |
|       | CoCl <sub>2</sub>     | 1:2              | 60                  | 330                       | CoTe <sub>2</sub>     |

|                       |                       |                     |       |     |                       |
|-----------------------|-----------------------|---------------------|-------|-----|-----------------------|
| Fe-Te                 | Fe(acac) <sub>3</sub> | 1:2                 | 60    | 300 | FeTe <sub>2</sub>     |
|                       | Fe(OAc) <sub>2</sub>  | 1:2                 | 60    | 330 | FeTe <sub>2</sub>     |
|                       | FeCl <sub>3</sub>     | 1:2                 | 60    | 300 | FeTe <sub>2</sub>     |
|                       | FeCl <sub>2</sub>     | 1:2                 | 60    | 300 | FeTe <sub>2</sub>     |
| Mn-Te                 | Mn(acac) <sub>2</sub> | 1:2                 | 120   | 330 | MnTe <sub>2</sub>     |
|                       |                       | 1:1.5               | 120   | 330 | MnTe <sub>2</sub>     |
|                       |                       | 1:1.5               | 60    | 330 | MnO+MnTe <sub>2</sub> |
|                       |                       | 1:1.5               | 45    | 330 | MnO+MnTe <sub>2</sub> |
|                       |                       | 1:1.5               | 30    | 330 | MnO                   |
|                       |                       | 1:1                 | 120   | 330 | MnO+MnTe <sub>2</sub> |
|                       | Mn(acac) <sub>3</sub> | 1:2                 | 120   | 330 | MnO+MnTe <sub>2</sub> |
|                       |                       | 1:2                 | 120   | 300 | MnO                   |
|                       | Mn(OAc) <sub>2</sub>  | 1:2                 | 120   | 330 | MnO                   |
|                       | MnCl <sub>2</sub>     | 1:2                 | 30    | 300 | No product            |
|                       | Cr-Te                 | Cr(CO) <sub>6</sub> | 1:1.8 | 120 | 350                   |
| Cr(acac) <sub>3</sub> |                       | 1:1.8               | 120   | 350 | No product            |
| CrCl <sub>3</sub>     |                       | 1:1.8               | 120   | 350 | No product            |
| CrCl <sub>2</sub>     |                       | 1:1.8               | 120   | 350 | No product            |

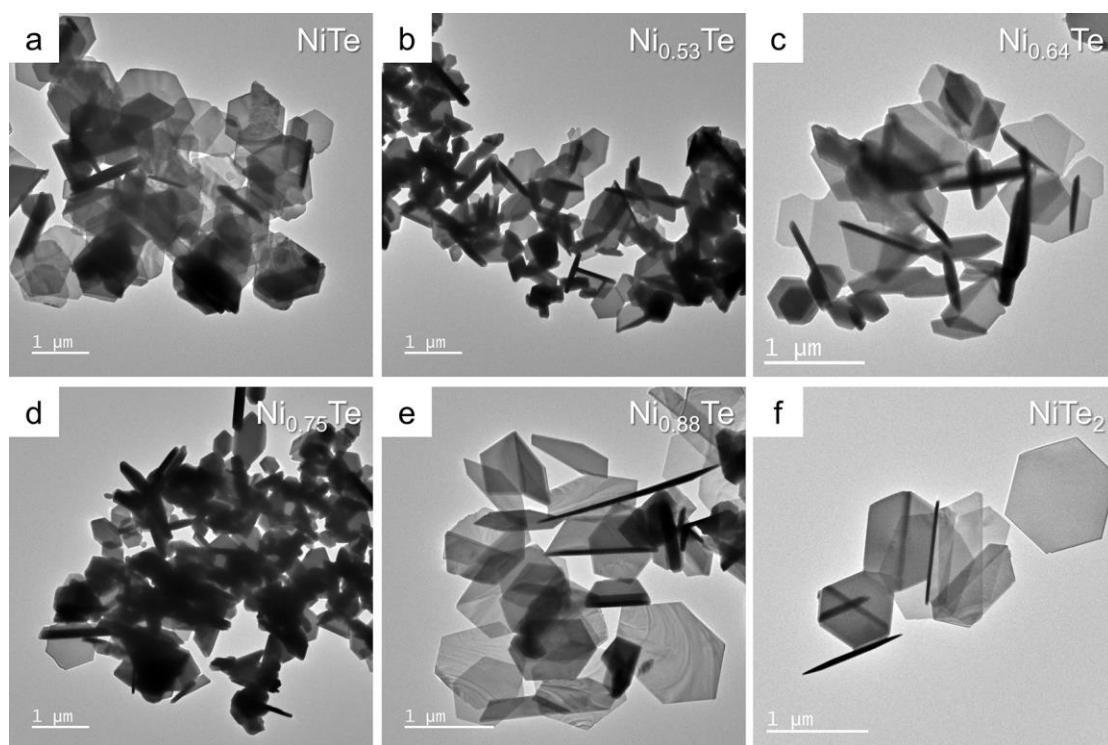

**Fig. S1.** TEM images different NiTe<sub>2-x</sub> nanosheets synthesized using Ni(acac)<sub>2</sub> precursor.

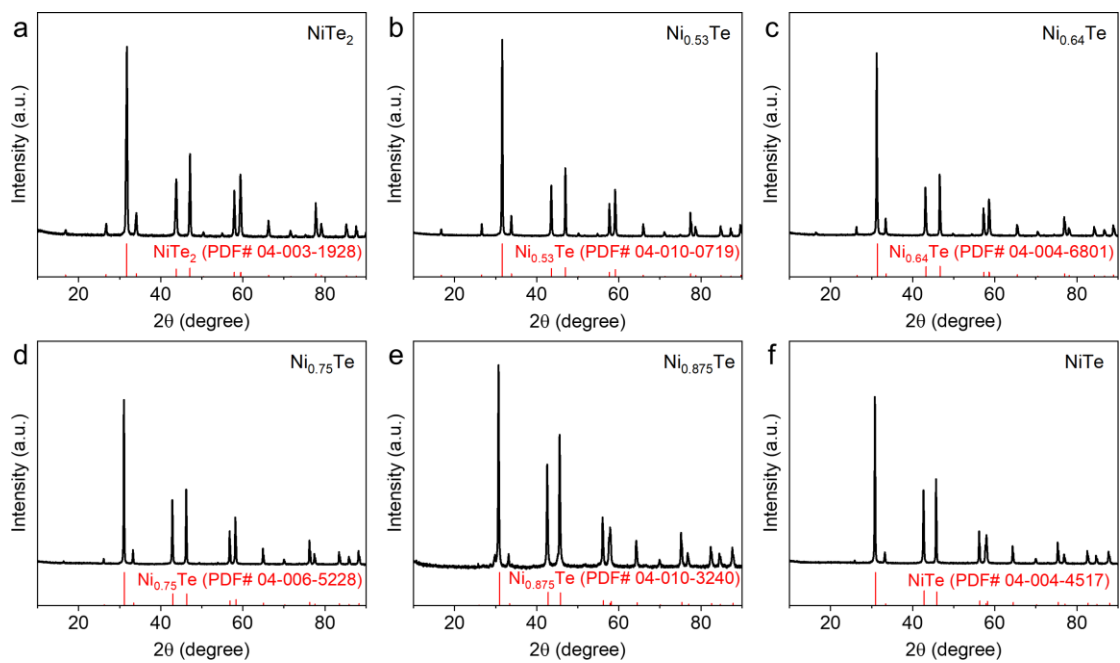

**Fig. S2.** XRD patterns of NiTe<sub>2-x</sub> nanosheets: (a) NiTe<sub>2</sub>, (b) Ni<sub>0.53</sub>Te, (c) Ni<sub>0.64</sub>Te, (d) Ni<sub>0.75</sub>Te, (e) Ni<sub>0.88</sub>Te, (f) NiTe.

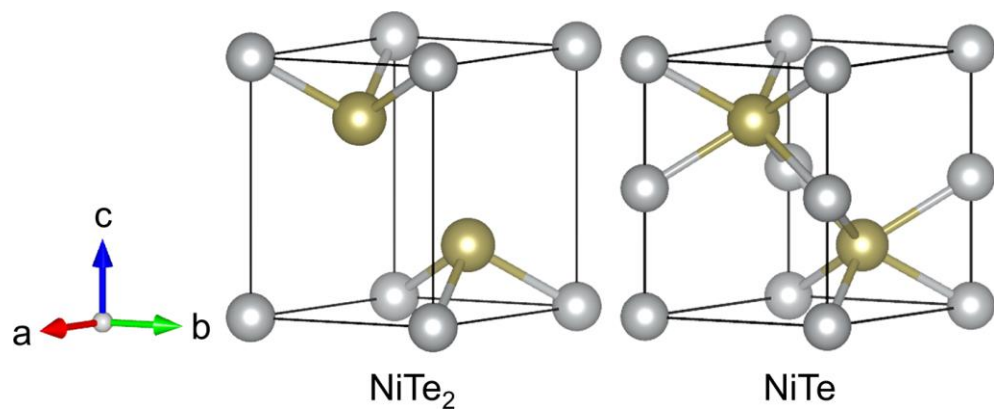

**Figure S3.** Structural models of  $\text{NiTe}_2$  and  $\text{NiTe}$ .

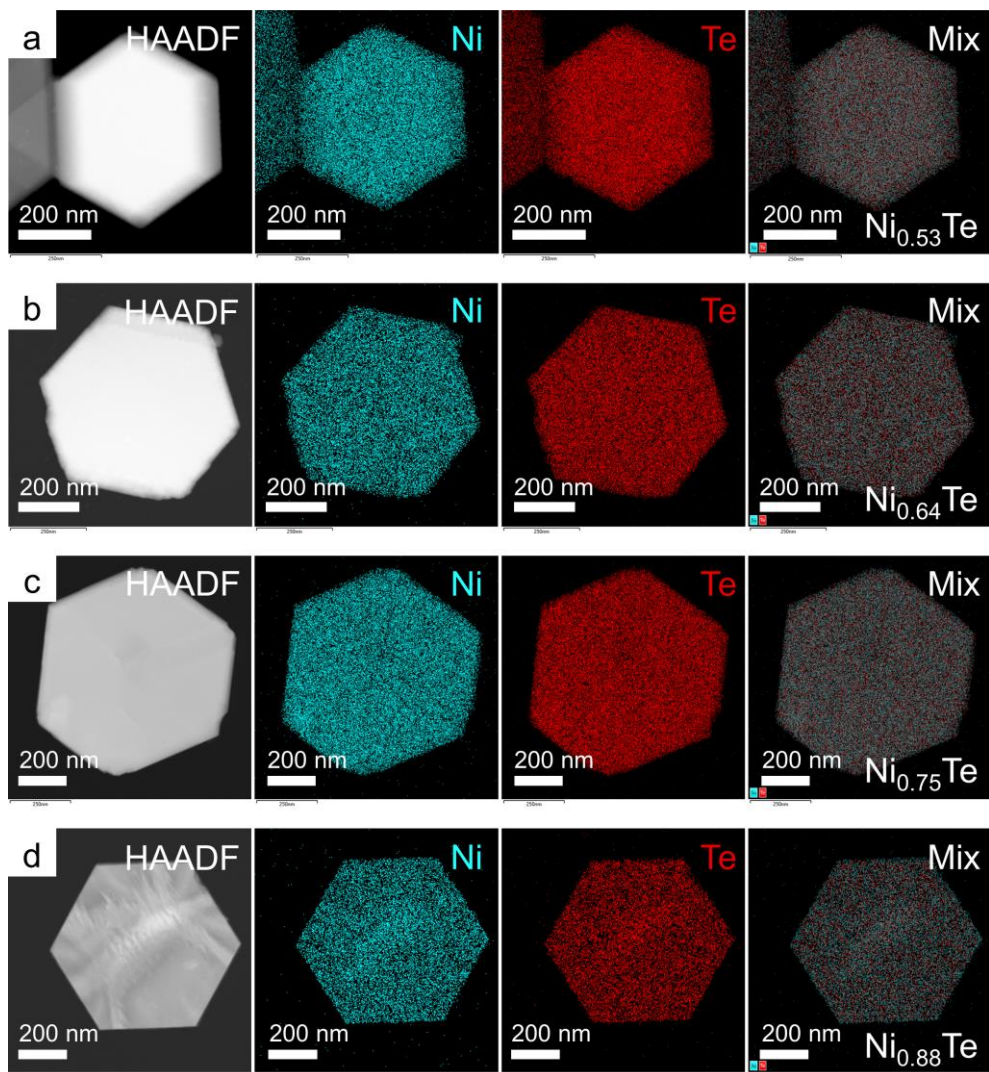

**Fig. S4.** HAADF and elemental maps of Ni and Te for (a)  $\text{Ni}_{0.53}\text{Te}$ , (b)  $\text{Ni}_{0.64}\text{Te}$ , (c)  $\text{Ni}_{0.75}\text{Te}$ , (d)  $\text{Ni}_{0.88}\text{Te}$ .

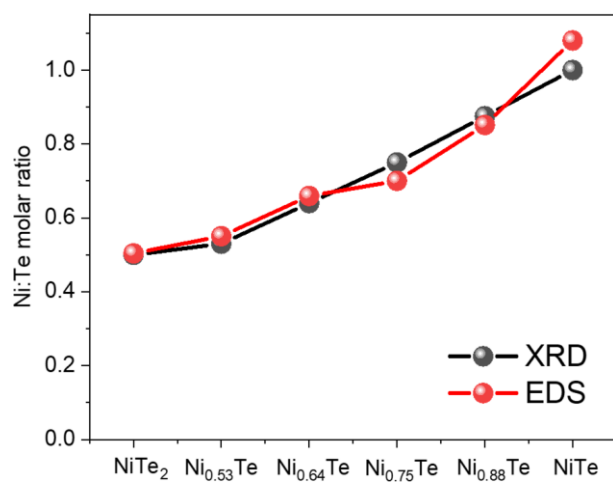

**Fig. S5.** Comparison of the Ni:Te molar ratio in various NiTe<sub>2-x</sub> based on quantitative EDS results and XRD patterns.



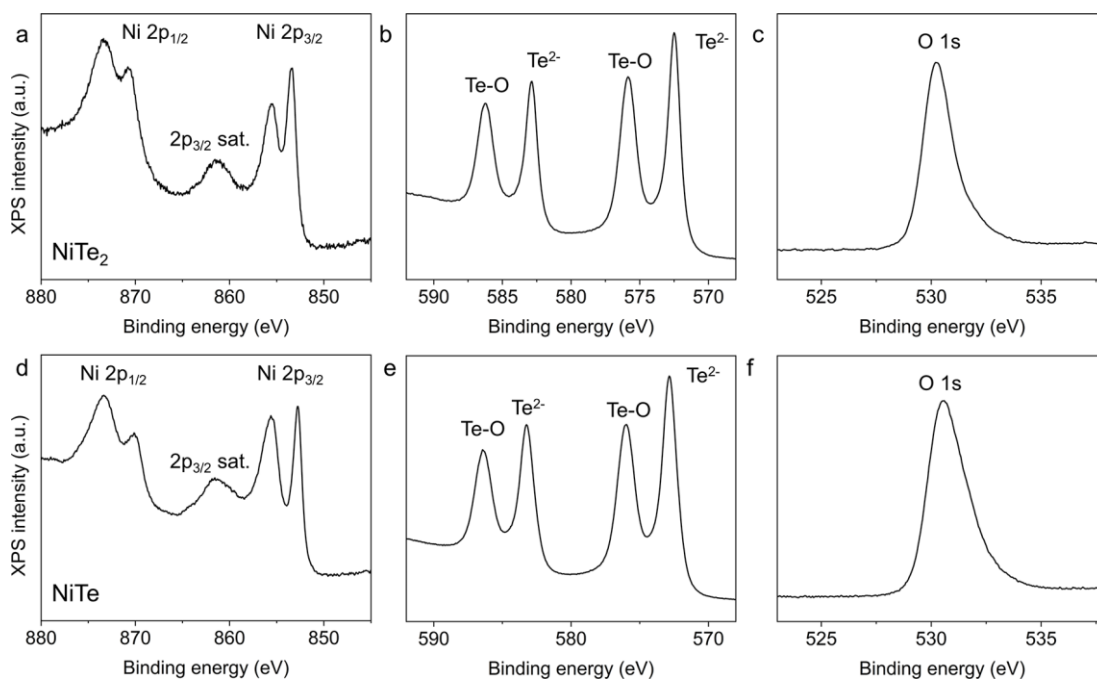

**Fig. S6.** XPS spectra of (a) Ni 2p, (b) Te 3d, (c) O 1s for NiTe<sub>2</sub> nanosheets. XPS spectra of (d) Ni 2p, (e) Te 3d, (f) O 1s for NiTe nanosheets.

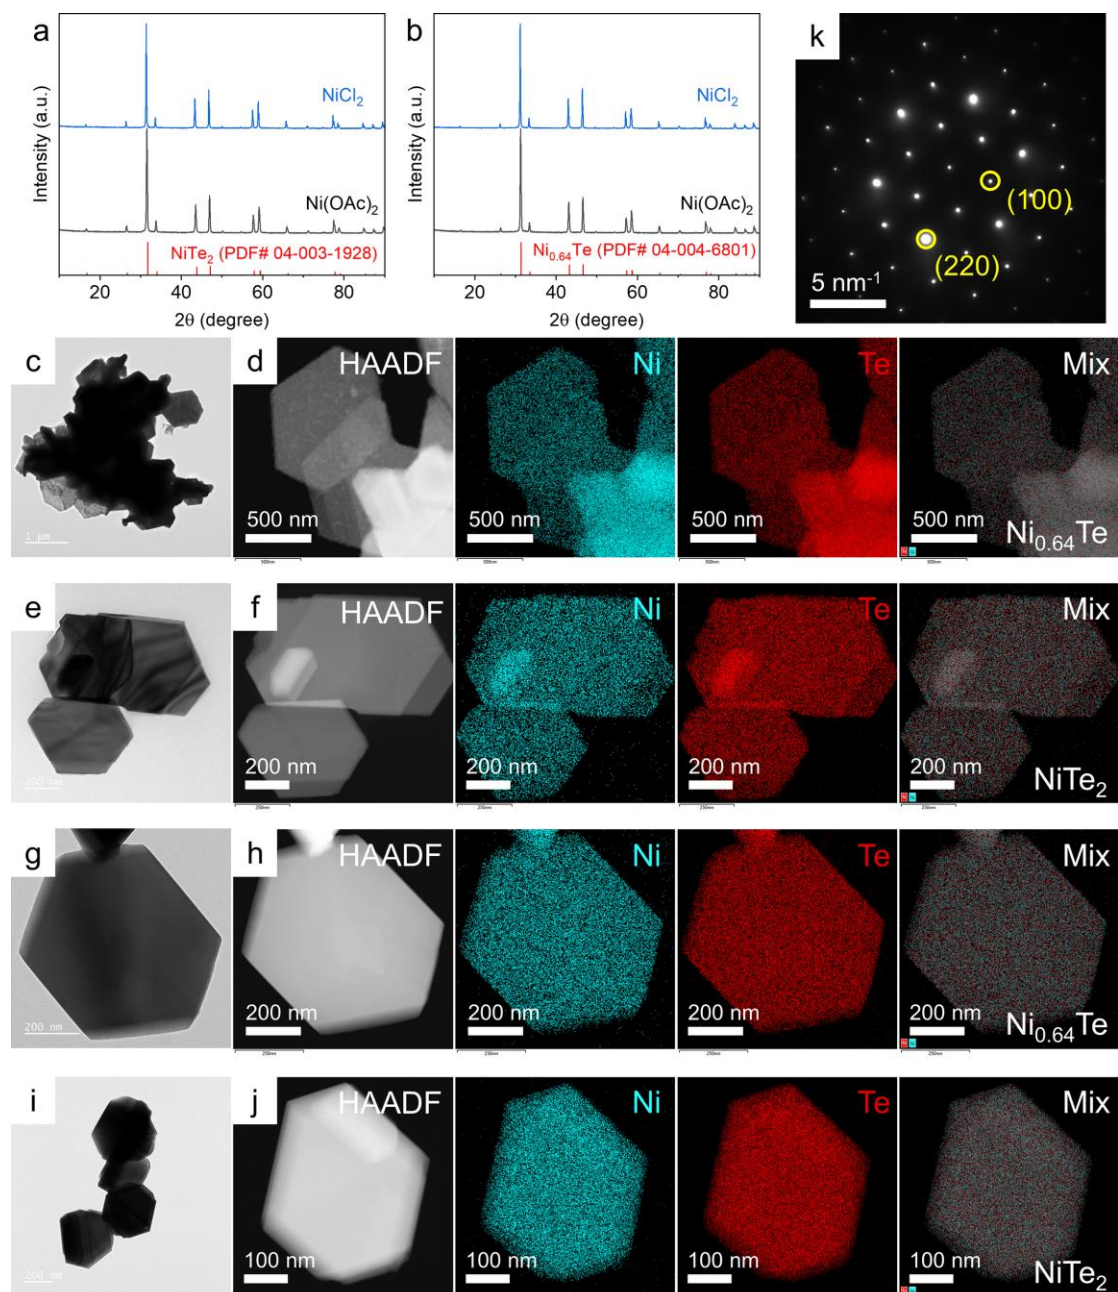

**Fig. S7.** XRD patterns of NiTe<sub>2-x</sub> nanosheets synthesized using NiCl<sub>2</sub> and Ni(OAc)<sub>2</sub> precursors: (a) NiTe<sub>2</sub> and (b) Ni<sub>0.64</sub>Te. (c,d) TEM and HAADF images, and elemental maps of Ni and Te of Ni<sub>0.64</sub>Te nanosheets synthesized using NiCl<sub>2</sub>. (e,f) TEM and HAADF images, and elemental maps of Ni and Te of NiTe<sub>2</sub> nanosheets synthesized using NiCl<sub>2</sub>. (g,h) TEM and HAADF images, and elemental maps of Ni and Te of Ni<sub>0.64</sub>Te nanosheets synthesized using Ni(OAc)<sub>2</sub>. (i,j) TEM and HAADF images, and elemental maps of Ni and Te of NiTe<sub>2</sub> nanosheets synthesized using Ni(OAc)<sub>2</sub>. (k) Representative SAED pattern of NiTe<sub>2</sub> nanosheets synthesized using NiCl<sub>2</sub>.

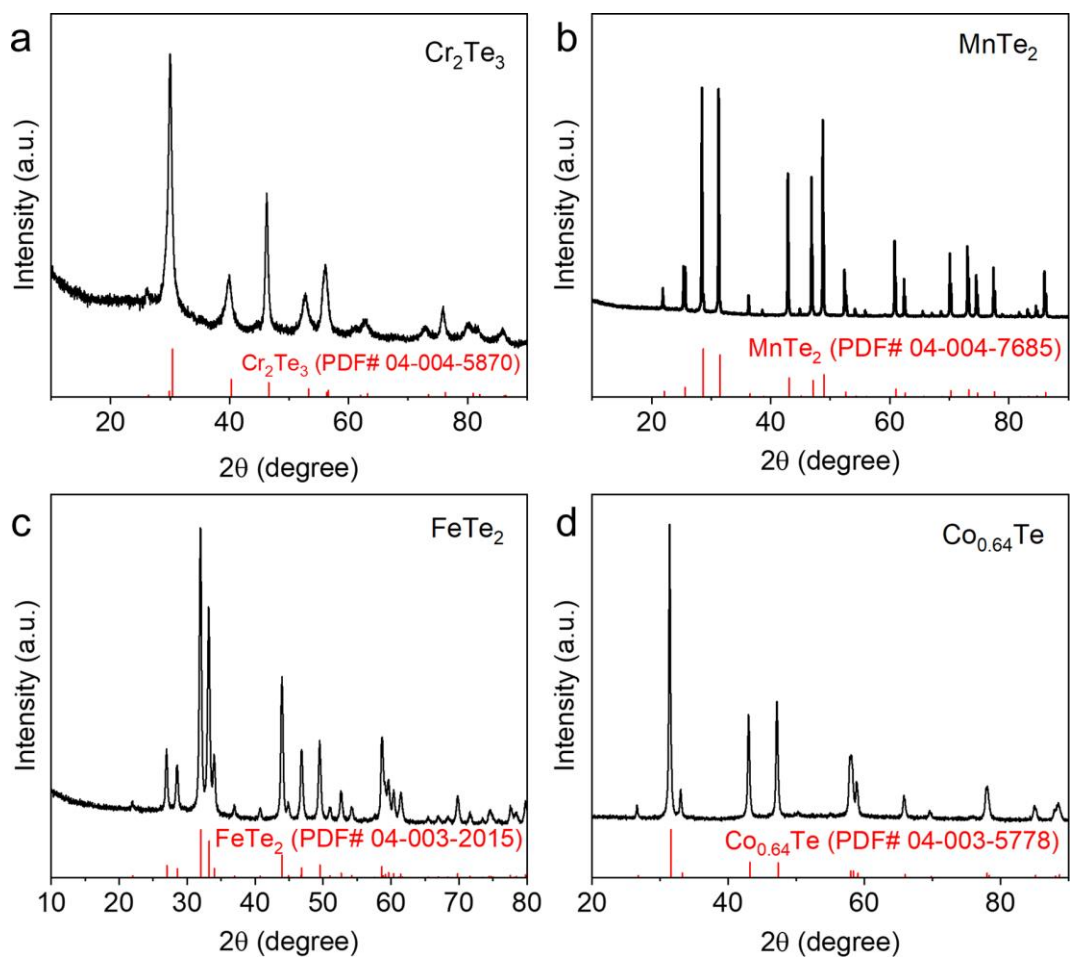

**Fig. S8.** XRD patterns of (a)  $\text{Cr}_2\text{Te}_3$ , (b)  $\text{MnTe}_2$ , (c)  $\text{FeTe}_2$ , and (d)  $\text{Co}_{0.64}\text{Te}$ .

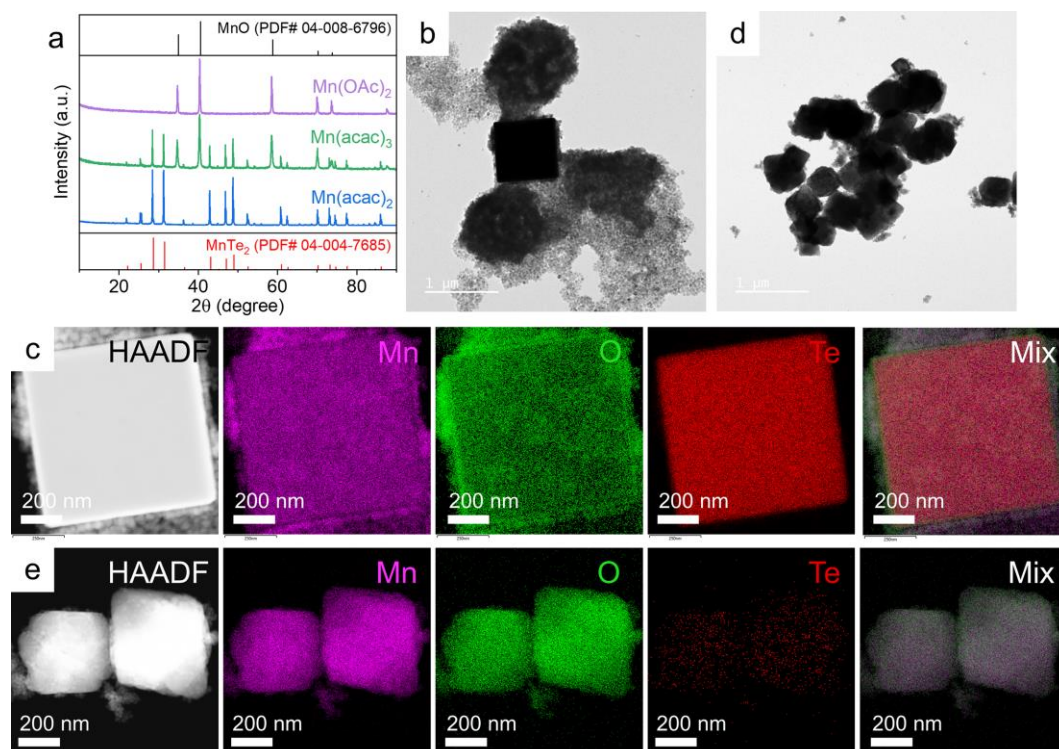

**Fig. S9.** (a) XRD patterns of the synthesis of the MnTe<sub>2</sub> nanocube using Mn(OAc)<sub>2</sub>, Mn(acac)<sub>3</sub>, and Mn(acac)<sub>2</sub> precursors: (b-c) TEM and HAADF images, and elemental maps of Mn, O, and Te of the mixture of MnTe<sub>2</sub> nanocube and MnO nanoparticles synthesized using Mn(acac)<sub>3</sub>. (d-e) TEM and HAADF images, and elemental maps of Mn, O, and Te of the large MnO nanoparticles synthesized using Mn(OAc)<sub>2</sub>.

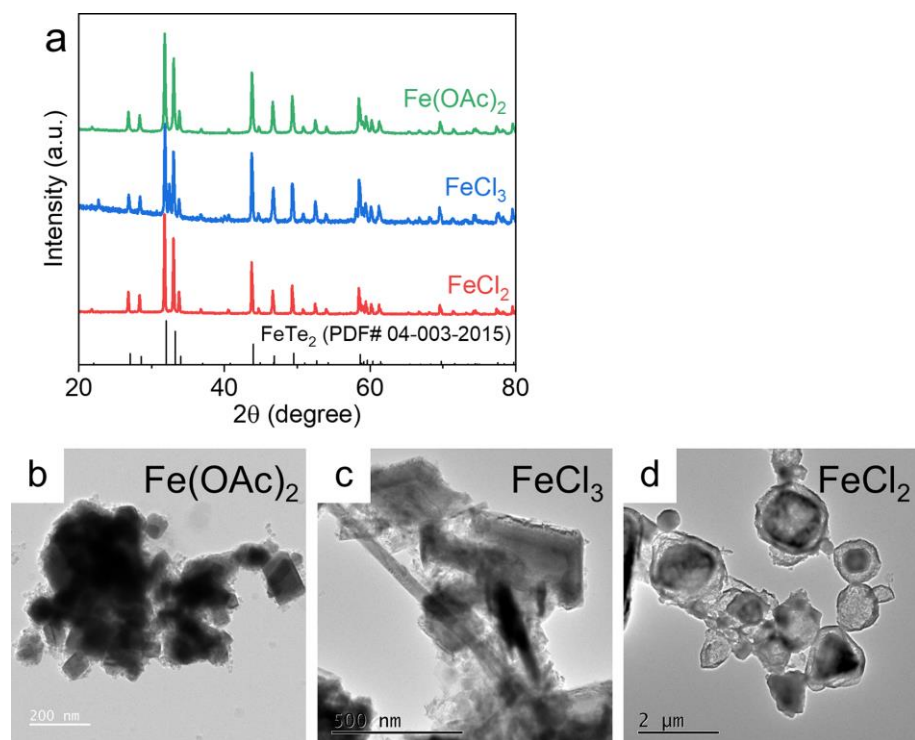

**Fig. S10.** (a) XRD patterns and TEM images of  $\text{FeTe}_2$  NCs synthesized using (b)  $\text{Fe(OAc)}_2$ , (c)  $\text{FeCl}_3$ , and (d)  $\text{FeCl}_2$  precursors, respectively.

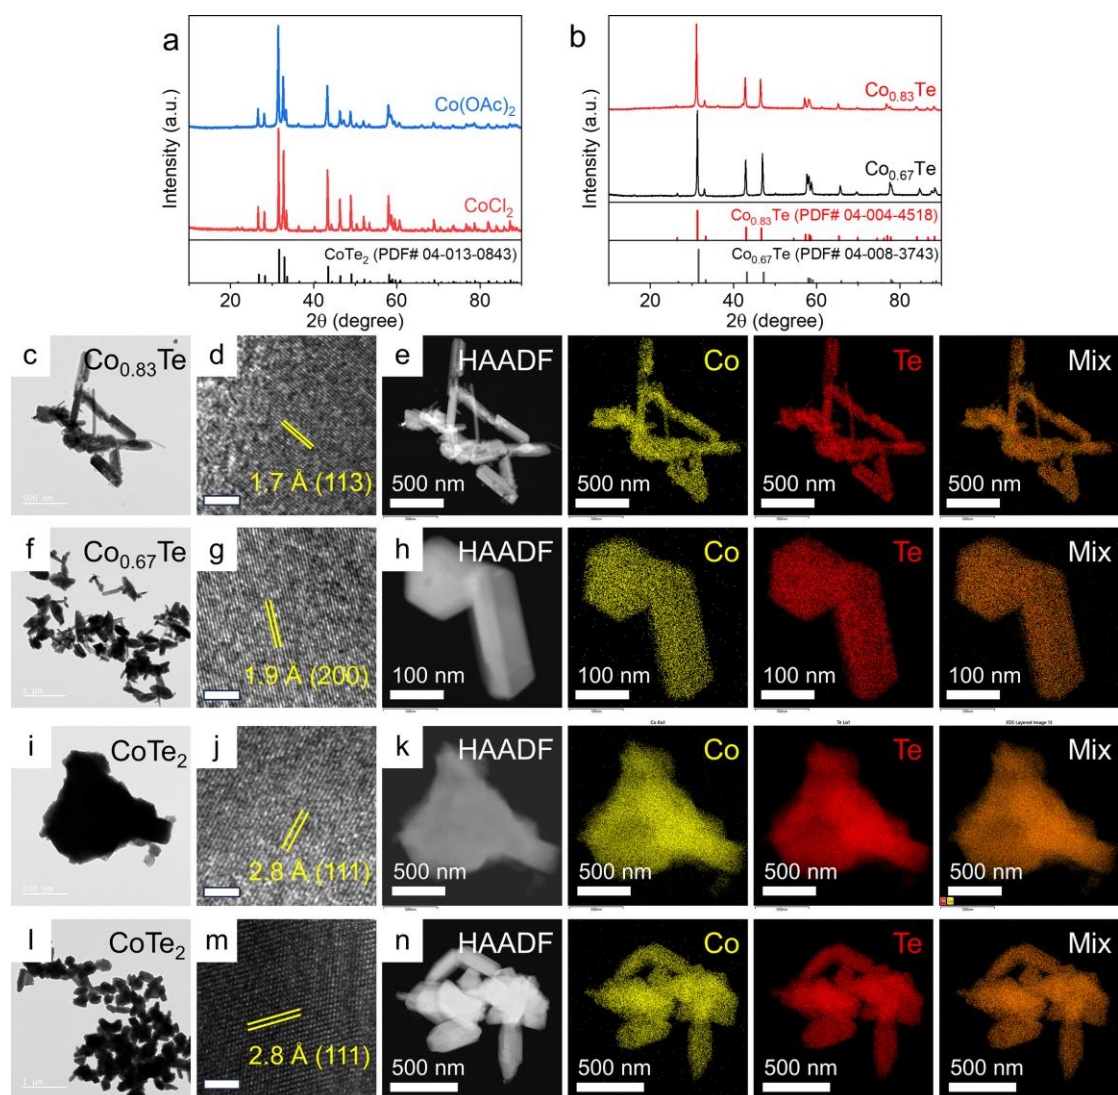

**Fig. S11.** XRD patterns of  $\text{CoTe}_{2-x}$  nanoplates synthesized using  $\text{CoCl}_2$  and  $\text{Co(OAc)}_2$  precursors: (a)  $\text{CoTe}_2$  and (b)  $\text{Co}_{0.64}\text{Te}$  and  $\text{Co}_{0.83}\text{Te}$ . (c-e) TEM, HRTEM and HAADF images, and elemental maps of Co and Te of  $\text{Co}_{0.83}\text{Te}$  nanoplates synthesized using  $\text{Co(OAc)}_2$ . (f-h) TEM, HRTEM and HAADF images, and elemental maps of Co and Te of  $\text{Co}_{0.67}\text{Te}$  nanoplates synthesized using  $\text{Co(OAc)}_2$ . (i-k) TEM, HRTEM and HAADF images, and elemental maps of Co and Te of  $\text{CoTe}_2$  nanoplates synthesized using  $\text{CoCl}_2$ . (l-n) TEM, HRTEM and HAADF images, and elemental maps of Co and Te of  $\text{CoTe}_2$  nanoplates synthesized using  $\text{Co(OAc)}_2$ . Undefined scale bars: 2 nm.

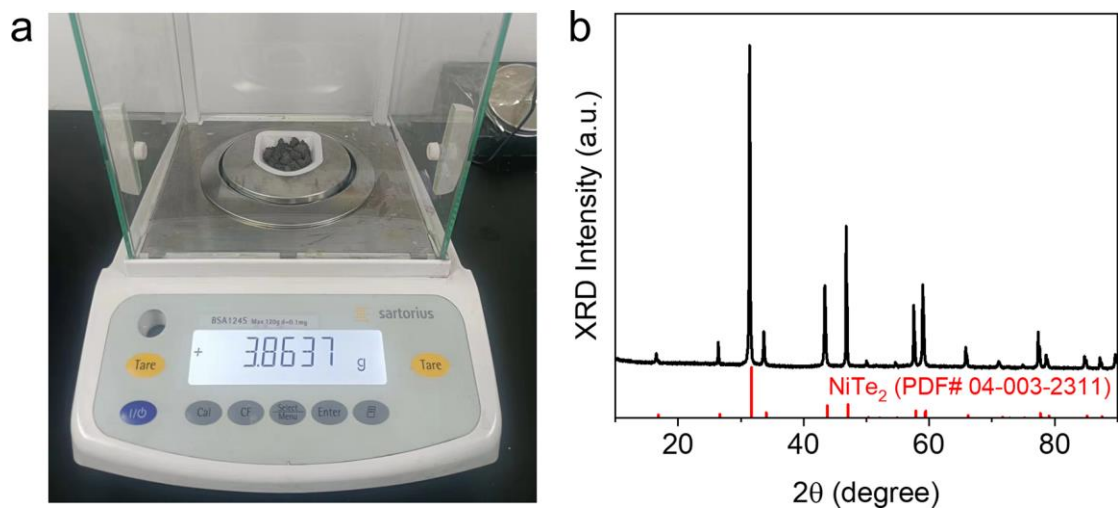

**Fig. S12.** (a) Photograph of  $\text{NiTe}_2$  nanosheets powders produced by large-scale synthesis in a single batch. (b) XRD pattern of  $\text{NiTe}_2$  nanosheets from scaled-up synthesis.

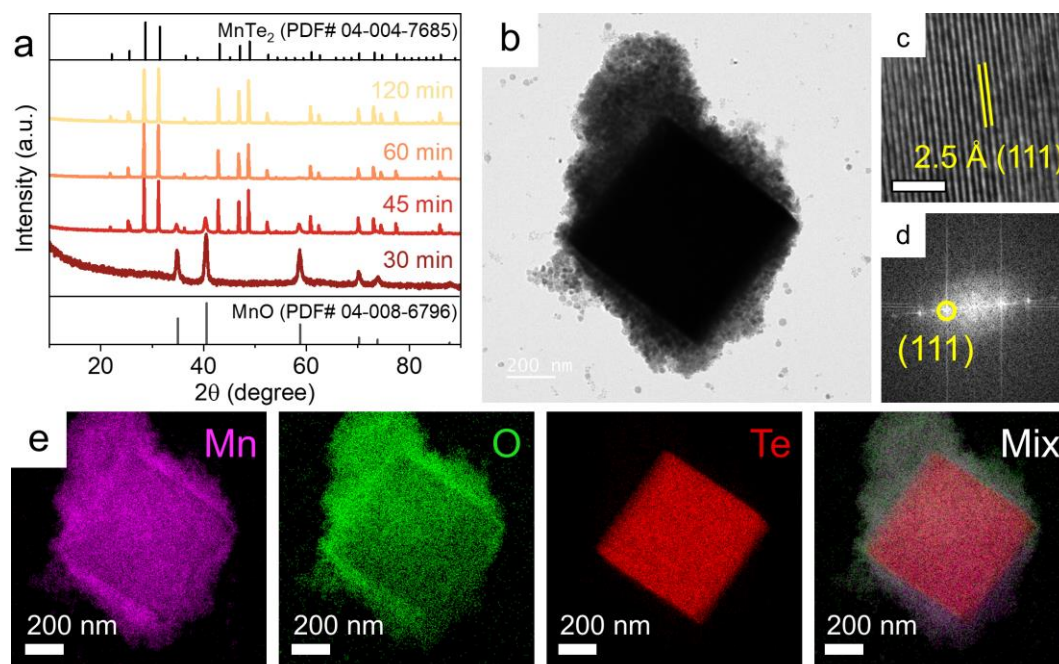

**Fig. S13.** XRD patterns of the transformation from MnO to MnTe<sub>2</sub> using Mn:Te ratio of 1:1.5. (b) TEM, HRTEM image, corresponding FFT pattern and elemental maps of Mn, O, and Te of MnO to MnTe<sub>2</sub> mixtures obtained at 45 min of the reaction. Undefined scale bars: 2 nm.



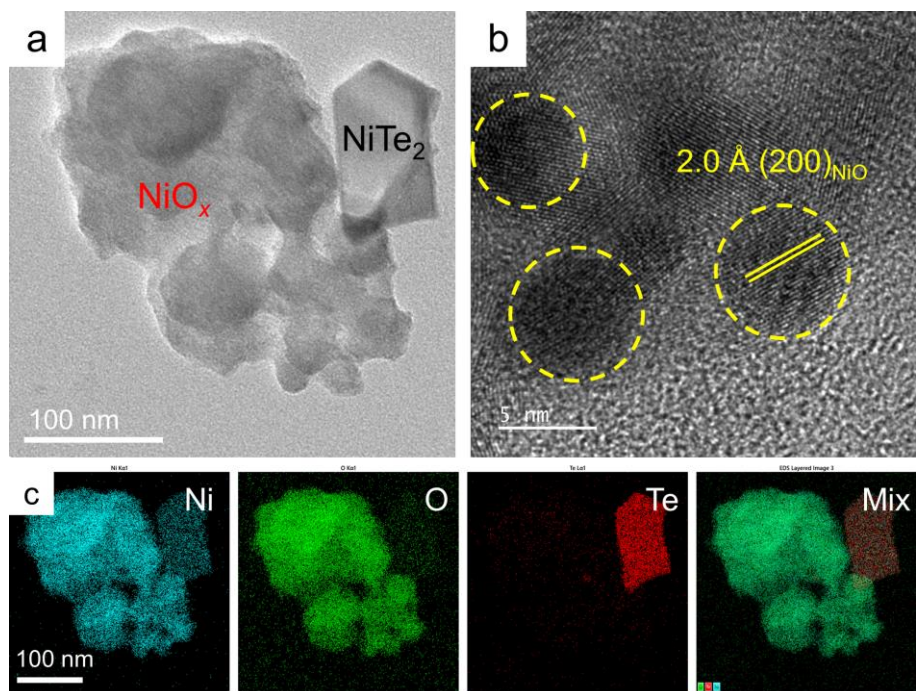

**Fig. 14.** (a) TEM image of the mixture of NiO<sub>x</sub> and NiTe<sub>2-x</sub> NCs at the initial stage for the synthesis of NiTe<sub>2</sub>, (b) HRTEM image of NiO<sub>x</sub> intermediates, (c) elemental maps of Ni, O, and Te for the mixture of NiO<sub>x</sub> and NiTe<sub>2-x</sub> NCs.

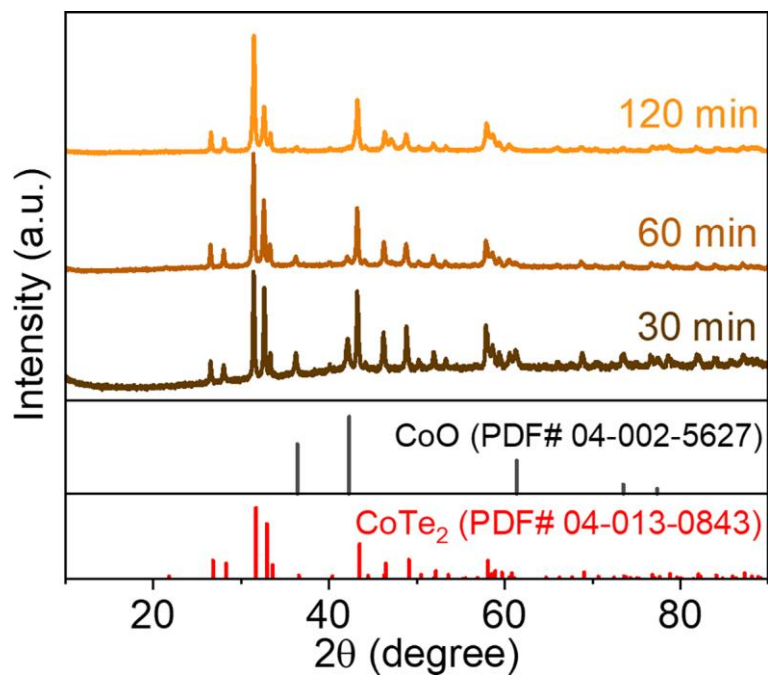

**Fig. S15.** XRD patterns aliquotes extracted from the synthesis of CoTe<sub>2</sub> nanoplates at different reaction times.

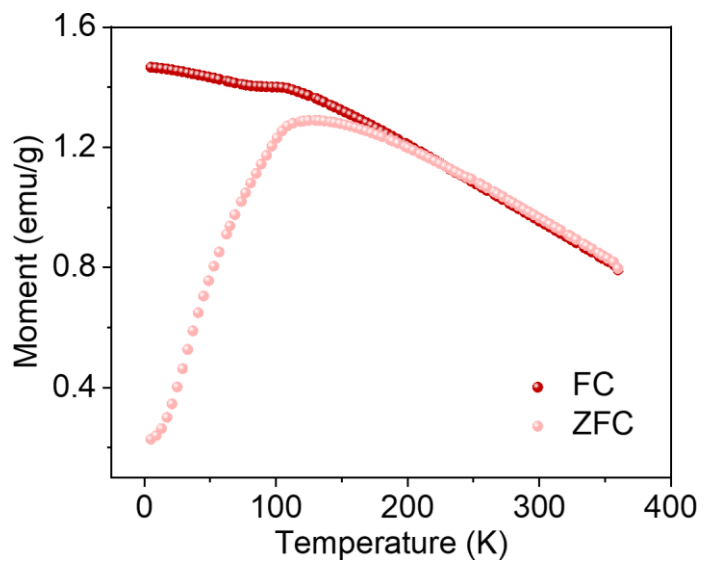

**Fig. S16.** M-T curve of FeTe<sub>2</sub>.

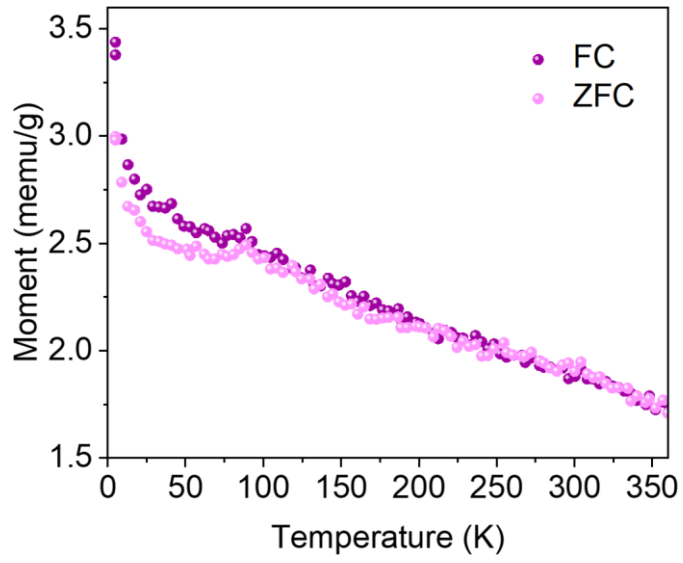

**Fig. S17.** M-T curve of MnTe<sub>2</sub>.

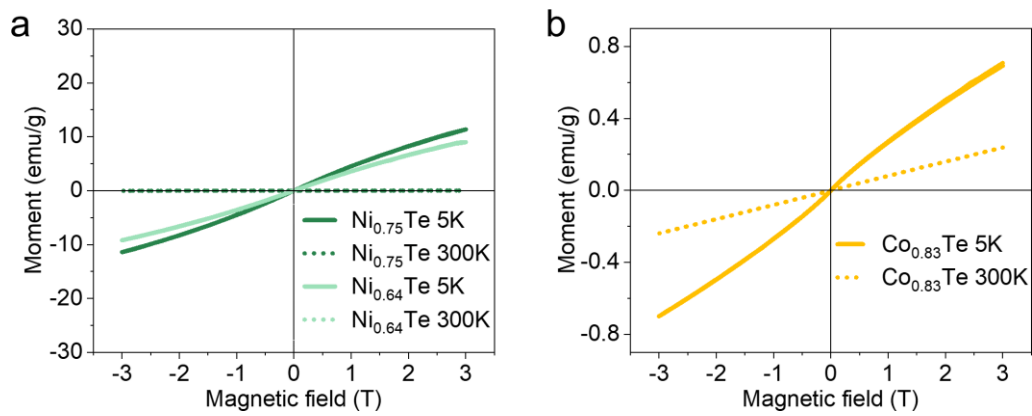

**Fig. S18.** M-T curve of (a)  $\text{Ni}_{0.75}\text{Te}$  and  $\text{Ni}_{0.64}\text{Te}$ , (b)  $\text{Co}_{0.83}\text{Te}$ .
